# Supplementary material for: Development of a Social Network for People Without a Diagnosis (RarePairs): Evaluation Study
Source: PubMed Central journal article supplement (PMC7556379; doi:10.2196/21849), 2020-09-29
Supplement: jmir_v22i9e21849_app2.pdf [file jmir_v22i9e21849_app2.pdf]

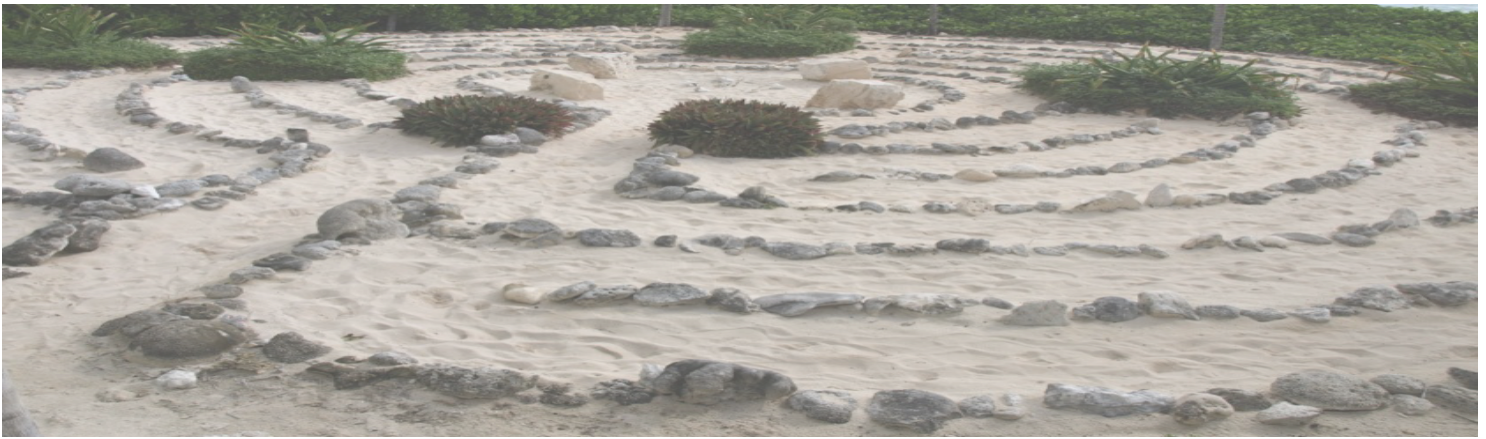

**Sie haben eine Seltene Erkrankung? Sie sind krank – aber niemand findet die Ursache? Es geht Ihnen schlecht – aber niemand glaubt Ihnen? Sie leiden an einer chronischen Erkrankung?**

# **IHRE ERFAHRUNG ZÄHLT!**

Sehr geehrte Damen und Herren,

das Projekt *Kurze Wege zur Diagnose* hat sich zum Ziel gesetzt, Menschen mit Hilfe eines Fragebogens und spezieller Computertechnik schneller zur Diagnose zu führen. Der beiliegende Fragenkatalog ist das Ergebnis der Auswertungen von Interviews mit erwachsenen Betroffenen sowie mit Eltern betroffener Kinder.

Nun benötigen wir auch **Ihre Hilfe** und **Ihr Erfahrungswissen**. Wir möchten Sie höflich bitten, den nachfolgenden Fragebogen auszufüllen und sich hierfür in **die Zeit, bevor Ihre Beschwerden einen Namen (eine „Diagnose“) hatten, zurückzusetzen**.

Die Beantwortung der Fragen wird nur einige Minuten dauern. Alle Angaben werden **komplett anonymisiert** und ausschließlich für das geschilderte Projekt verwendet.

Für Fragen, Rückmeldungen und Anregungen stehen wir Ihnen jederzeit sehr gerne zur Verfügung.

**Vielen Dank für Ihre Mithilfe!**

PD Dr. Lorenz Grigull, Susanne Blöß (B.A.), Sandra Mehmecke (M.A.)

**EINE BEFRAGUNG DER:**

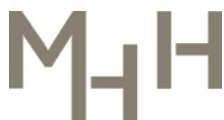

im Rahmen des Projekts

Seltene chronische Erkrankungen –  
Kurze Wege zur Diagnose

**KONTAKT:**

Medizinische Hochschule Hannover  
Abteilung Päd. Hämatologie und Onkologie  
Carl-Neuberg-Straße 1  
30625 Hannover

E-Mail: **Bloess.Susanne@mh-hannover.de**

Tel: **0511-532-9476**

Fax: 0511-532-16-9467

Homepage: <https://www.mh-hannover.de/kurzewege.html>

**GEFÖRDERT VON:**

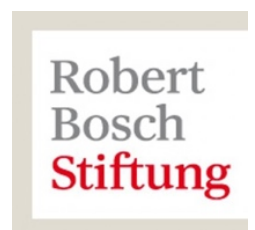

**Den Fragebogen finden Sie auch online unter: <http://imdiagnostics.com/selten>  
mit dem Passwort: „selten“**

Im Folgenden finden Sie eine Reihe von Fragen. Als Antwortmöglichkeiten können Sie für jede Frage zwischen „nein“, „eher nicht“, „eher schon“, „ja“ und „weiß nicht“ wählen. Bitte machen Sie entsprechend Ihrer Antwort **jeweils nur ein Kreuz**. Dabei können Sie gar nichts falsch machen, denn es gibt keine für jede Person zutreffenden Antworten.

## I. ALLGEMEIN:

Diagnose (falls bekannt):

Sie beantworten den Fragebogen als Betroffene(r)  Sie beantworten den Fragebogen als Angehörige(r)

Geschlecht: weiblich  männlich

Alter in Jahren: \_\_\_\_\_ Dauer Ihrer Diagnosesuche in Jahren: \_\_\_\_\_

Fragebogen-ID (bitte nicht ausfüllen):

## II. URSACHENSUCHE:

|     | Antwortmöglichkeiten:                                                                                                                                                                                            | nein                     | eher nicht               | eher schon               | ja                       | weiß nicht               |
|-----|------------------------------------------------------------------------------------------------------------------------------------------------------------------------------------------------------------------|--------------------------|--------------------------|--------------------------|--------------------------|--------------------------|
| 1.  | Ahnen/ ahnten Sie – ggf. schon länger – dass „etwas“ mit Ihnen <b>nicht</b> stimmt?                                                                                                                              | <input type="checkbox"/> | <input type="checkbox"/> | <input type="checkbox"/> | <input type="checkbox"/> | <input type="checkbox"/> |
| 2.  | Trifft es zu, dass Ihre Beschwerden/ irritierenden Erscheinungen bei Ärzten/ Ihrem Arzt erst einmal ohne Reaktion blieb?                                                                                         | <input type="checkbox"/> | <input type="checkbox"/> | <input type="checkbox"/> | <input type="checkbox"/> | <input type="checkbox"/> |
| 3.  | Hat man bei Ihnen auffällige Untersuchungsergebnisse (z.B. <i>Blutwerte, EKG, Hautveränderungen, usw.</i> ) festgestellt, deren Ursache jedoch zunächst <b>nicht</b> weiter untersucht wurde?                    | <input type="checkbox"/> | <input type="checkbox"/> | <input type="checkbox"/> | <input type="checkbox"/> | <input type="checkbox"/> |
| 4.  | Trifft es zu, dass es schwierig für Sie ist/ war, Ihre Beschwerden/ irritierenden Erscheinungen in Worte zu fassen?                                                                                              | <input type="checkbox"/> | <input type="checkbox"/> | <input type="checkbox"/> | <input type="checkbox"/> | <input type="checkbox"/> |
| 5.  | Haben Sie es jemals für möglich gehalten, dass die Ursache für Ihre Beschwerden/ irritierenden Erscheinungen in Ihren Lebensgewohnheiten (z.B. <i>Ernährung, Wohnverhältnisse, Reisen, usw.</i> ) liegen könnte? | <input type="checkbox"/> | <input type="checkbox"/> | <input type="checkbox"/> | <input type="checkbox"/> | <input type="checkbox"/> |
| 6.  | Wurden bei Ihnen viele Untersuchungen durchgeführt, die ohne Ergebnis blieben?                                                                                                                                   | <input type="checkbox"/> | <input type="checkbox"/> | <input type="checkbox"/> | <input type="checkbox"/> | <input type="checkbox"/> |
| 7.  | Gingen oder gehen Sie immer wieder mit denselben Beschwerden/ irritierenden Erscheinungen zu Ärzten/ Ihrem Arzt?                                                                                                 | <input type="checkbox"/> | <input type="checkbox"/> | <input type="checkbox"/> | <input type="checkbox"/> | <input type="checkbox"/> |
| 8.  | Haben Sie wegen unterschiedlicher Beschwerden/ irritierender Erscheinungen verschiedene Fachärzte aufgesucht?                                                                                                    | <input type="checkbox"/> | <input type="checkbox"/> | <input type="checkbox"/> | <input type="checkbox"/> | <input type="checkbox"/> |
| 9.  | Erinnern Sie sich – im Zusammenhang mit Ihren Beschwerden – an eine Situation, die Sie als besonders bedrohlich erlebt haben?                                                                                    | <input type="checkbox"/> | <input type="checkbox"/> | <input type="checkbox"/> | <input type="checkbox"/> | <input type="checkbox"/> |
| 10. | Setzen Sie im Alltag spezielle Techniken ( <i>Tricks und Kniffe</i> ) ein, um Ihre Einschränkungen auszugleichen?                                                                                                | <input type="checkbox"/> | <input type="checkbox"/> | <input type="checkbox"/> | <input type="checkbox"/> | <input type="checkbox"/> |
| 11. | Vermeiden Sie bewusst Aktivitäten (Tätigkeiten), bei denen Ihre Beschwerden/ irritierenden Erscheinungen sichtbar werden?                                                                                        | <input type="checkbox"/> | <input type="checkbox"/> | <input type="checkbox"/> | <input type="checkbox"/> | <input type="checkbox"/> |
| 12. | Haben Sie sich aus eigener Initiative heraus über mögliche Ursachen Ihrer Beschwerden/ irritierenden Erscheinungen informiert?                                                                                   | <input type="checkbox"/> | <input type="checkbox"/> | <input type="checkbox"/> | <input type="checkbox"/> | <input type="checkbox"/> |
| 13. | Haben Ihre Beschwerden/ irritierenden Erscheinungen im Laufe der Zeit immer wieder andere Namen (Diagnosen) erhalten?                                                                                            | <input type="checkbox"/> | <input type="checkbox"/> | <input type="checkbox"/> | <input type="checkbox"/> | <input type="checkbox"/> |
| 14. | Haben Sie im Verlauf Ihrer Diagnosesuche von sich aus nach Ärzten (Spezialisten, Experten) gesucht?                                                                                                              | <input type="checkbox"/> | <input type="checkbox"/> | <input type="checkbox"/> | <input type="checkbox"/> | <input type="checkbox"/> |
| 15. | Haben Sie schon einmal die Durchführung von <b>Untersuchungen</b> von Ärzten/ Ihrem Arzt gefordert?                                                                                                              | <input type="checkbox"/> | <input type="checkbox"/> | <input type="checkbox"/> | <input type="checkbox"/> | <input type="checkbox"/> |
| 16. | Haben Sie den Eindruck, dass die von Ihnen geschilderten Beschwerden von Ärzten/ Ihrem Arzt ernst genommen werden/ wurden?                                                                                       | <input type="checkbox"/> | <input type="checkbox"/> | <input type="checkbox"/> | <input type="checkbox"/> | <input type="checkbox"/> |

|     |                                                                                                                                                             | <i>Antwortmöglichkeiten:</i> |                          |                          |                          |                          |
|-----|-------------------------------------------------------------------------------------------------------------------------------------------------------------|------------------------------|--------------------------|--------------------------|--------------------------|--------------------------|
|     |                                                                                                                                                             | nein                         | eher nicht               | eher schon               | ja                       | weiß nicht               |
| 17. | Trifft es zu, dass Sie Ihr Vertrauen in Ärzte/ Ihren Arzt verloren haben?                                                                                   | <input type="checkbox"/>     | <input type="checkbox"/> | <input type="checkbox"/> | <input type="checkbox"/> | <input type="checkbox"/> |
| 18. | Hatten Sie schon einmal den Punkt erreicht, an dem Sie Ihre Diagnosesuche aufgegeben haben?                                                                 | <input type="checkbox"/>     | <input type="checkbox"/> | <input type="checkbox"/> | <input type="checkbox"/> | <input type="checkbox"/> |
| 19. | Trifft es zu, dass bei Ihnen eine psychische/ psychosomatische Erkrankung (z.B. aufgrund von Stress, traumatischen Erlebnissen, usw.) vermutet wird/ wurde? | <input type="checkbox"/>     | <input type="checkbox"/> | <input type="checkbox"/> | <input type="checkbox"/> | <input type="checkbox"/> |
| 20. | Gab es ein bestimmtes Erlebnis, dass Ihnen die Zunahme (Verschlechterung) Ihrer Beschwerden besonders vor Augen führte?                                     | <input type="checkbox"/>     | <input type="checkbox"/> | <input type="checkbox"/> | <input type="checkbox"/> | <input type="checkbox"/> |

### III. KRANKHEITSZEICHEN:

|     |                                                                                                                                                                                             | <i>Antwortmöglichkeiten:</i> |                          |                          |                          |                          |
|-----|---------------------------------------------------------------------------------------------------------------------------------------------------------------------------------------------|------------------------------|--------------------------|--------------------------|--------------------------|--------------------------|
|     |                                                                                                                                                                                             | nein                         | eher nicht               | eher schon               | ja                       | weiß nicht               |
| 21. | Haben/ hatten Sie häufig erhöhte Temperatur (Fieber)?                                                                                                                                       | <input type="checkbox"/>     | <input type="checkbox"/> | <input type="checkbox"/> | <input type="checkbox"/> | <input type="checkbox"/> |
| 22. | Leiden Sie an mehreren Beschwerden/ irritierenden Erscheinungen zugleich (z.B. Husten <u>und</u> Gewichtsverlust / Hautausschlag <u>und</u> Leistungsknick <u>und</u> Sehverschlechterung)? | <input type="checkbox"/>     | <input type="checkbox"/> | <input type="checkbox"/> | <input type="checkbox"/> | <input type="checkbox"/> |
| 23. | Leiden Sie unter ständiger Müdigkeit?                                                                                                                                                       | <input type="checkbox"/>     | <input type="checkbox"/> | <input type="checkbox"/> | <input type="checkbox"/> | <input type="checkbox"/> |
| 24. | Haben/ hatten Sie eine irritierende Besonderheit (z.B. Verfärbungen der Haut, Größerwerden von Körperteilen, Zittern, Zuckungen, usw.) an sich festgestellt?                                | <input type="checkbox"/>     | <input type="checkbox"/> | <input type="checkbox"/> | <input type="checkbox"/> | <input type="checkbox"/> |
| 25. | Leiden/ litten Sie immer wieder unter starke Schmerzen?                                                                                                                                     | <input type="checkbox"/>     | <input type="checkbox"/> | <input type="checkbox"/> | <input type="checkbox"/> | <input type="checkbox"/> |
| 26. | Hat Ihre körperliche Leistungsfähigkeit (z.B. im Sport, beim Treppensteigen, usw.) spürbar abgenommen?                                                                                      | <input type="checkbox"/>     | <input type="checkbox"/> | <input type="checkbox"/> | <input type="checkbox"/> | <input type="checkbox"/> |
| 27. | Haben Sie Atembeschwerden an sich festgestellt (z.B. Kurzatmigkeit bei Belastung, starker Husten, Schnarchen, Atemaussetzer, usw.)?                                                         | <input type="checkbox"/>     | <input type="checkbox"/> | <input type="checkbox"/> | <input type="checkbox"/> | <input type="checkbox"/> |
| 28. | Trifft es zu, dass Sie einen unsicheren Gang haben (z.B. weil Sie schwanken, stolpern, stürzen, usw.)?                                                                                      | <input type="checkbox"/>     | <input type="checkbox"/> | <input type="checkbox"/> | <input type="checkbox"/> | <input type="checkbox"/> |
| 29. | Waren Sie aufgrund Ihrer Beschwerden schon einmal voller Verzweiflung?                                                                                                                      | <input type="checkbox"/>     | <input type="checkbox"/> | <input type="checkbox"/> | <input type="checkbox"/> | <input type="checkbox"/> |
| 30. | Trifft es zu, dass Sie von Menschen aus Ihrem Umfeld (Familie, Bekannte, Freunde, Kollegen, usw.) auf körperliche Auffälligkeiten angesprochen wurden?                                      | <input type="checkbox"/>     | <input type="checkbox"/> | <input type="checkbox"/> | <input type="checkbox"/> | <input type="checkbox"/> |

### IV. BESCHWERDEN UNTER KONTROLLE BRINGEN:

|     |                                                                                                                                            | <i>Antwortmöglichkeiten:</i> |                          |                          |                          |                          |
|-----|--------------------------------------------------------------------------------------------------------------------------------------------|------------------------------|--------------------------|--------------------------|--------------------------|--------------------------|
|     |                                                                                                                                            | nein                         | eher nicht               | eher schon               | ja                       | weiß nicht               |
| 31. | Haben Sie mit der Zeit gelernt, Ihre Beschwerden besser einzuschätzen?                                                                     | <input type="checkbox"/>     | <input type="checkbox"/> | <input type="checkbox"/> | <input type="checkbox"/> | <input type="checkbox"/> |
| 32. | Haben Sie von sich aus versucht, Ihre Beschwerden zu lindern (z.B. durch Schmerzmittel, Salben, Wickel, Sport, besondere Ernährung, usw.)? | <input type="checkbox"/>     | <input type="checkbox"/> | <input type="checkbox"/> | <input type="checkbox"/> | <input type="checkbox"/> |
| 33. | Haben Sie bei Ärzten/ bei Ihrem Arzt schon einmal auf eine bestimmte <b>Behandlung (Therapie)</b> bestanden?                               | <input type="checkbox"/>     | <input type="checkbox"/> | <input type="checkbox"/> | <input type="checkbox"/> | <input type="checkbox"/> |

### V. BESONDERS SEIN:

|     |                                                                                                                | <i>Antwortmöglichkeiten:</i> |                          |                          |                          |                          |
|-----|----------------------------------------------------------------------------------------------------------------|------------------------------|--------------------------|--------------------------|--------------------------|--------------------------|
|     |                                                                                                                | nein                         | eher nicht               | eher schon               | ja                       | weiß nicht               |
| 34. | Trifft es zu, dass Sie Dinge können, die Andere nicht können – oder anders herum?                              | <input type="checkbox"/>     | <input type="checkbox"/> | <input type="checkbox"/> | <input type="checkbox"/> | <input type="checkbox"/> |
| 35. | Werden Ihnen Ihre Beschwerden/ irritierenden Erscheinungen erst im Vergleich mit „gesunden“ Menschen deutlich? | <input type="checkbox"/>     | <input type="checkbox"/> | <input type="checkbox"/> | <input type="checkbox"/> | <input type="checkbox"/> |

|     |                                                                                                                                             | <i>Antwortmöglichkeiten:</i> |                          |                          |                          |                          |
|-----|---------------------------------------------------------------------------------------------------------------------------------------------|------------------------------|--------------------------|--------------------------|--------------------------|--------------------------|
|     |                                                                                                                                             | nein                         | eher nicht               | eher schon               | ja                       | weiß nicht               |
| 36. | Galten Sie als Kind/ im jugendlichen Alter als unsportlich ( <i>waren Sie z.B. vom Schulsport befreit oder nahmen hieran ungern teil?</i> ) | <input type="checkbox"/>     | <input type="checkbox"/> | <input type="checkbox"/> | <input type="checkbox"/> | <input type="checkbox"/> |
| 37. | Stehen/ standen Sie aufgrund Ihrer Beschwerden/ irritierenden Erscheinungen häufig im Mittelpunkt?                                          | <input type="checkbox"/>     | <input type="checkbox"/> | <input type="checkbox"/> | <input type="checkbox"/> | <input type="checkbox"/> |
| 38. | Trifft es zu, dass Sie sich für sichtbare Veränderungen schämen/ schämten?                                                                  | <input type="checkbox"/>     | <input type="checkbox"/> | <input type="checkbox"/> | <input type="checkbox"/> | <input type="checkbox"/> |
| 39. | Sind Ihre Beschwerden für Andere verborgen bzw. äußerlich unsichtbar?                                                                       | <input type="checkbox"/>     | <input type="checkbox"/> | <input type="checkbox"/> | <input type="checkbox"/> | <input type="checkbox"/> |
| 40. | Haben Sie den Eindruck, dass andere Menschen auf Sie Rücksicht nehmen müssen?                                                               | <input type="checkbox"/>     | <input type="checkbox"/> | <input type="checkbox"/> | <input type="checkbox"/> | <input type="checkbox"/> |
| 41. | Haben/ hatten Sie Ihre Beschwerden so weit wie möglich zurückgedrängt, im Bemühen, ein normales Leben zu führen?                            | <input type="checkbox"/>     | <input type="checkbox"/> | <input type="checkbox"/> | <input type="checkbox"/> | <input type="checkbox"/> |
| 42. | Ist/ war die Ungewissheit über die Ursache Ihrer Beschwerden für Sie das Schlimmste?                                                        | <input type="checkbox"/>     | <input type="checkbox"/> | <input type="checkbox"/> | <input type="checkbox"/> | <input type="checkbox"/> |
| 43. | Trifft es zu, dass Sie schon einmal selbst geglaubt haben, sich Ihre Beschwerden nur einzubilden (einzureden)?                              | <input type="checkbox"/>     | <input type="checkbox"/> | <input type="checkbox"/> | <input type="checkbox"/> | <input type="checkbox"/> |

## VI. SOZIALES UMFELD:

|     |                                                                                                                                                                                                                   | <i>Antwortmöglichkeiten:</i> |                          |                          |                          |                          |
|-----|-------------------------------------------------------------------------------------------------------------------------------------------------------------------------------------------------------------------|------------------------------|--------------------------|--------------------------|--------------------------|--------------------------|
|     |                                                                                                                                                                                                                   | nein                         | eher nicht               | eher schon               | ja                       | weiß nicht               |
| 44. | Haben/ hatten Sie den Eindruck, dass Ihr Umfeld ( <i>Familie, Freunde, Bekannte, Kollegen, usw.</i> ) Ihre Beschwerden <b>nicht</b> ernst nimmt ( <i>z.B. dass jemand sagt: „Ist doch nicht so schlimm...“</i> )? | <input type="checkbox"/>     | <input type="checkbox"/> | <input type="checkbox"/> | <input type="checkbox"/> | <input type="checkbox"/> |
| 45. | Trifft es zu, dass Sie Ihrem Umfeld ( <i>z.B. Familie, Bekannte, Freunde, Kollegen</i> ) Informationen zu Ihren Beschwerden/ irritierenden Erscheinungen bewusst vorenthalten?                                    | <input type="checkbox"/>     | <input type="checkbox"/> | <input type="checkbox"/> | <input type="checkbox"/> | <input type="checkbox"/> |
| 46. | Trifft es zu, dass Sie lieber zu Hause bleiben ( <i>z.B. weniger mit Freunden unternehmen, usw.</i> ), seit Ihre Beschwerden/ irritierende Erscheinungen deutlich sind?                                           | <input type="checkbox"/>     | <input type="checkbox"/> | <input type="checkbox"/> | <input type="checkbox"/> | <input type="checkbox"/> |
| 47. | Haben Sie eine bestimmte Vertrauensperson, auf die Sie sich – im Zusammenhang mit Ihren Beschwerden/ irritierenden Erscheinungen – zu 100% verlassen können?                                                      | <input type="checkbox"/>     | <input type="checkbox"/> | <input type="checkbox"/> | <input type="checkbox"/> | <input type="checkbox"/> |

## VII. ALLTAG:

|     |                                                                                                                                                                             | <i>Antwortmöglichkeiten:</i> |                          |                          |                          |                          |
|-----|-----------------------------------------------------------------------------------------------------------------------------------------------------------------------------|------------------------------|--------------------------|--------------------------|--------------------------|--------------------------|
|     |                                                                                                                                                                             | nein                         | eher nicht               | eher schon               | ja                       | weiß nicht               |
| 48. | Verzichten Sie auf bestimmte Aktivitäten, die Ihnen eigentlich Freude machen?                                                                                               | <input type="checkbox"/>     | <input type="checkbox"/> | <input type="checkbox"/> | <input type="checkbox"/> | <input type="checkbox"/> |
| 49. | Haben Sie aufgrund Ihrer Beschwerden/ irritierender Erscheinungen Veränderungen in Ihrem Alltag ( <i>z.B. Tagesablauf geändert, alternative Wege gewählt</i> ) vorgenommen? | <input type="checkbox"/>     | <input type="checkbox"/> | <input type="checkbox"/> | <input type="checkbox"/> | <input type="checkbox"/> |
| 50. | Trifft es zu, dass Sie Unternehmungen ( <i>z.B. Ausgehen, Tagesausflüge, Urlaubsreisen, usw.</i> ) sehr vorrausschauend und genau planen/ planen?                           | <input type="checkbox"/>     | <input type="checkbox"/> | <input type="checkbox"/> | <input type="checkbox"/> | <input type="checkbox"/> |
| 51. | Greifen Sie auf Hilfsmittel zurück, um im Alltag besser zurecht zu kommen?                                                                                                  | <input type="checkbox"/>     | <input type="checkbox"/> | <input type="checkbox"/> | <input type="checkbox"/> | <input type="checkbox"/> |
| 52. | Ziehen Sie aufgrund Ihrer gesundheitlichen Situation eine berufliche Veränderung in Erwägung (bzw. haben Sie diese bereits umgesetzt)?                                      | <input type="checkbox"/>     | <input type="checkbox"/> | <input type="checkbox"/> | <input type="checkbox"/> | <input type="checkbox"/> |
| 53. | Trifft es zu, dass Sie – im Vergleich mit anderen Menschen – größere Anstrengungen unternehmen müssen, um Ihre Ziele zu erreichen?                                          | <input type="checkbox"/>     | <input type="checkbox"/> | <input type="checkbox"/> | <input type="checkbox"/> | <input type="checkbox"/> |

**VIELEN DANK FÜR IHRE WERTVOLLE UNTERSTÜTZUNG!**
