# Supplementary material for: Development of a Social Network for People Without a Diagnosis (RarePairs): Evaluation Study
Source: PubMed Central journal article supplement (PMC7556379; doi:10.2196/21849), 2020-09-29
Supplement: jmir_v22i9e21849_app4.pdf [file jmir_v22i9e21849_app4.pdf]

# RarePairs

Hier sind seltene Erkrankungen Normalität.

1

## Melde dich an

wenn du seit mehreren Wochen Beschwerden hast,  
die dir und evtl. deinen Ärzten unerklärlich sind  
und du auf der Suche nach  
einer Diagnose, Linderung oder Kontakten bist.

2

## Komm in Kontakt

mit anderen Menschen,  
die ähnliche Beschwerden haben.

3

## Findet gemeinsam Lösungen

Unterstützt euch gegenseitig.

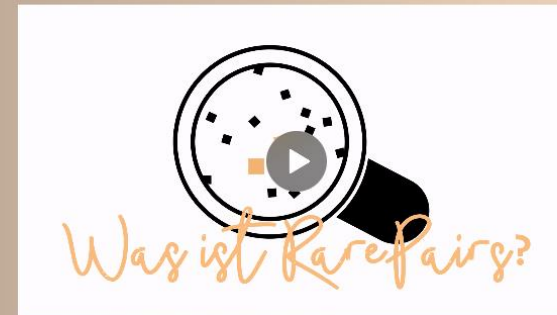

Registriere dich jetzt.

Natürlich schützen wir deine Daten und verwenden sie nur, um für dich passende Matches zu finden. Wir geben sie nicht an Dritte weiter.

Benutzername (z.B. ab123)

E-Mail-Adresse

Passwort

Kostenlos registrieren

Login (ich bin bereits registriert)

Landing Page of RarePairs where users can get information, register or log in. User find information by text and in form of a short video addressing aims and scope of RarePairs. Currently, the landing page is in German language.

# Q53plus

Mit künstlicher Intelligenz zum RareMatch

Hast du bereits eine Diagnose oder nicht? Wähle hier aus.

Du hast eine Diagnose, die nicht in der obigen Liste steht? Dann trage sie hier ein:

Welchem Geschlecht gehörst du an?

- weiblich  
 männlich

Wie alt bist du?

Wie viele Jahre suchst du schon nach der richtigen Diagnose?

Hast du bereits einen Arzt, dem du bezüglich deiner Erkrankung besonders vertraust?

- ja  
 nein

Erhältst du bereits eine Therapie, die deine Krankheit heilt oder lindert?

- ja  
 nein

Bist du bereits im Austausch mit anderen Erkrankten? (z.B. über eine Selbsthilfegruppe oder ein Online-Forum)

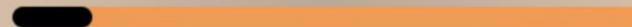

Auf gehts!

*First page of the questionnaire addressing basic issues (. Is there already a diagnosis or not, is the user active in a patient group?, and age of the user). On the bottom of the page a user can see a progress bar.*

Geschafft!

Das sind deine RareMatches

Mit wem würdest du gerne als erstes Kontakt aufnehmen?

Alle andere Personen kannst du später auch noch kontaktieren, falls du möchtest.

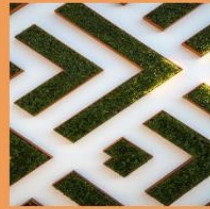

Dr.Sommer

sucht: andere Betroffene

Diagnose: Dissoziative IdentitätsstörungArzt: ja

Therapie: ja Patientengruppe: nein

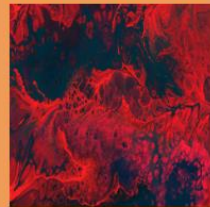

nando123

sucht: andere Betroffene

Diagnose: nein Arzt: nein

Therapie: nein Patientengruppe: nein

*After completing the questionnaire the user can visualize his /her matches and has the option to contact them.*

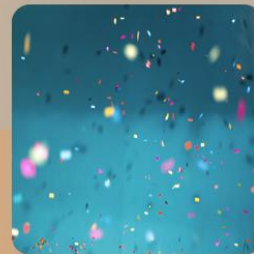[Nachricht senden](#)

stefano1

18 Jahre

Diagnose  Arzt  Therapie  Patientengruppe

sucht: Diagnose

[zu meiner Person](#)

Ich bin Stefan und gehe noch zur Schule. Sport kann ich schon länger nicht mehr betreiben, da bin ich auf Computerspiele umgestiegen.

[zu meinen Beschwerden](#)

Eigentlich habe ich Beschwerden seit ich klein bin, nach ca. einem Jahr war dann auch klar, dass es Mukoviszidose ist. Seither versuche ich das Beste draus zu machen.

*This screenshot shows the profile of another user in RarePairs.*

RarePairs

Home Chat Messages Refresh

 paul84

 regina44

2020-04-05 10:11:47

Hi Stefan, the matching algorithm told me that we could be a good fit! Maybe we could get to know each other? What is your condition? I look forward to your answer! Regina

2020-04-05 10:17:16

Hi Regina, thank you for your message! I suffer from cystic fibrosis. What is your condition? I am only 19 years old and still go to school. What do you do for a living? Bye, Stefan

2020-04-05 10:21:14

Oh, that sounds really like a bad diagnosis. How do you cope with it? Can you have a normal life? Sorry, I am not very aware of the symptoms of CF. I suffer from sarcoidosis. It is kind of a tissue disease I think. But I only just got my diagnosis, so I am not a real expert on my disease yet. My symptoms are joint pains and lung issues. So maybe we were brought together because of the lung problems? Do you have trouble with it in every day life? Can you do sports?

2020-04-05 10:24:53

CF is very different from person to person. I am really lucky and could manage quite good for some time. I do a lot of "exercise" every day, but it is not sport like you would know it. It mainly is medical exercise to make my lungs free from fluids. It is not fun and I rather would be healthy, but I do not know a healthy life, so I can not really compare. I think I am doing the best I can to have a good life. How about you? How do you cope with this new diagnosis? How do you manage things like job, sports, ... having sarcoidosis?

senden

English Version

Feedback Über RarePairs Datenschutz Kontakt Impressum © RarePairs 2019

*PairChat for communicating with one single person. On the left the users can find their current chat partners and on the right they can see all messages they exchanged with the selected chat partner.*

RarePairs

PairCommunity

zeige nur:

Studien  Selbsthilfegruppen  Freizeitgruppen  Fachwissen

Beitrag verfassen

Filter anwenden

Selbsthilfegruppen

regina44 2020-01-20 11:09:15

Gründung digitale Selbsthilfegruppe

Hallo ihr anderen Betroffenen, vor kurzem habe ich die Diagnose Sarkoidose bekommen und fühle mich ziemlich alleine damit. Leider wohne ich sehr weit draußen auf dem Land und suche daher auf digitalem Weg ein paar Mitstreitende. Ich würde gerne z.B. ein WhatsApp Gruppe gründen, in der wir uns austauschen können. Schreibt mich einfach an, wenn ihr dabei sein wollt! Ich freue mich über Kontakte. Liebe Grüße, Regina

Fachwissen

emily 2019-06-14 21:34:03

Meditation

Weiß jemand, ob Meditation bei Kopfschmerzen helfen kann?

Studien

Loretta174 2019-03-06 09:09:48

Diagnose und KI

Hallo zusammen - an der Medizinischen Hochschule Hannover startet demnächst ein Projekt, welches Leuten ohne Diagnose helfen soll. Ihr könnt auch mitmachen. Sprecht einfach Euren Hausarzt an. Ansprechpartner an der MHH ist Prof. Lorenz Grigull, Grigull.Lorenz@mh-hannover.de

English Version

Feedback Über RarePairs Datenschutz Kontakt Impressum © RarePairs 2019

*PairCommunity is the name of the forum where users can communicate with all other users at once. On the top, a filtering function is indicated. Here, users can choose to see only selected postings, e.g. current scientific studies or expert knowledge. Users can click on the button on the right to write their own postings and in the center of the page you can see all postings in chronological order.*
