# Supplementary material for: Development of a Social Network for People Without a Diagnosis (RarePairs): Evaluation Study
Source: PubMed Central journal article supplement (PMC7556379; doi:10.2196/21849), 2020-09-29
Supplement: jmir_v22i9e21849_app6.pdf [file jmir_v22i9e21849_app6.pdf]

|                                                   | Accordance in Percent |         |         |               |                   |                                                              |
|---------------------------------------------------|-----------------------|---------|---------|---------------|-------------------|--------------------------------------------------------------|
| Distance calculating method                       | Gender                | Age     | Latency | Disease group | Diagnostic system | Exact diagnosis                                              |
| (Pseudo-)random sampling<br>(=negative benchmark) | 59.640                | 15.704  | 11.850  | 8.304         | 31.716            | 3.813                                                        |
| <b>L<sub>p</sub> Minkowski family</b>             |                       |         |         |               |                   |                                                              |
| Manhattan                                         | 63.864*               | 21.871* | 14.317  | 16.218*       | 40.298*           | 9.383*                                                       |
| Euclidean                                         | 62.487*               | 21.161  | 15.447* | 15.982*       | 36.105*           | <b>9.712</b><br>(=positive benchmark)                        |
| Minkowski                                         | 63.823*               | 21.881* | 14.358  | 16.218*       | 40.298*           | 9.383*                                                       |
| <b>L<sub>1</sub> family</b>                       |                       |         |         |               |                   |                                                              |
| Sørensen                                          | 64.810*               | 22.107* | 13.196  | 15.324*       | 37.780*           | 8.767                                                        |
| Gower                                             | 63.823*               | 21.881* | 14.358  | 16.218*       | 40.298*           | 9.383*                                                       |
| Canberra                                          | 64.162*               | 21.531* | 13.957  | 15.817*       | 37.646*           | 9.353*<br><br>(does not differ from pos. benchmark; p = .56) |
| Lorentzian                                        | 63.546*               | 21.727* | 13.936  | 15.889*       | 39.404*           | 9.322*                                                       |
| <b>Intersection family</b>                        |                       |         |         |               |                   |                                                              |
| Wave Hedges                                       | 64.049*               | 21.490* | 13.977  | 15.899*       | 38.253*           | 9.322                                                        |
| Czekanowski                                       | 64.810*               | 22.107* | 13.196  | 15.324*       | 37.780*           | 8.767                                                        |

|                                                |                                        |                                                  |                                                  |                                                           |                                                                                        |                                                 |
|------------------------------------------------|----------------------------------------|--------------------------------------------------|--------------------------------------------------|-----------------------------------------------------------|----------------------------------------------------------------------------------------|-------------------------------------------------|
| Tanimoto                                       | <b>64.810</b><br>(=positive benchmark) | <b>22.107</b><br>(=positive benchmark)           | 13.196<br>(differs from neg. benchmark; p = .00) | 15.324*                                                   | 37.780*                                                                                | 8.767                                           |
| Jaccard                                        | 63.782*                                | 21.305                                           | 13.823                                           | 14.892                                                    | 35.396*                                                                                | 8.715                                           |
| Dice                                           | 63.782*                                | 21.305<br>(differs from pos. benchmark; p = .03) | 13.823                                           | 14.892<br>(differs from pos. benchmark; p = .05)          | 35.396*                                                                                | 8.715<br>(differs from neg. benchmark; p = .00) |
| <b>Inner Product family</b>                    |                                        |                                                  |                                                  |                                                           |                                                                                        |                                                 |
| Cosine                                         | 53.587#<br>(< neg. benchmark)          | 11.973#<br>(< neg. benchmark)                    | 7.307#<br>(< neg. benchmark)                     | 4.697#<br>(< neg. benchmark)                              | 16.978#<br>(< neg. benchmark)                                                          | 1.932#<br>(< neg. benchmark)                    |
| <b>Fidelity family or Squared-chord family</b> |                                        |                                                  |                                                  |                                                           |                                                                                        |                                                 |
| Bhattacharyya                                  | 64.769*                                | 19.003<br>(differs from neg. benchmark; p = .00) | 7.914#<br>(< neg. benchmark)                     | 10.062#<br>(does not differ from neg. benchmark; p = .70) | 32.312<br>(differs from neg. benchmark; p = .00; differs from pos. benchmark; p = .00) | 2.806#<br>(< neg. benchmark)                    |
| Hellinger                                      | 62.929*                                | 19.291                                           | 5.807#<br>(< neg. benchmark)                     | 7.441#<br>(< neg. benchmark)                              | <b>52.467</b><br>(=positive benchmark)                                                 | 0.308#<br>(< neg. benchmark)                    |
| Squared-Chord                                  | 61.984*                                | 21.603*                                          | 15.334*                                          | 15.632*                                                   | 35.200*                                                                                | 9.609*                                          |
| <b>Squared L2 family dX2 family</b>            |                                        |                                                  |                                                  |                                                           |                                                                                        |                                                 |

|                                 |                                                              |                                                              |                                                              |                                                              |                                                              |                                                     |
|---------------------------------|--------------------------------------------------------------|--------------------------------------------------------------|--------------------------------------------------------------|--------------------------------------------------------------|--------------------------------------------------------------|-----------------------------------------------------|
| Neyman                          | 59.496#<br>( $<$ neg. benchmark)                             | 20.411                                                       | 15.211<br>(differs from pos. benchmark; $p = .02$ )          | 14.892<br>(differs from neg. benchmark; $p = .00$ )          | 34.234*                                                      | 9.024                                               |
| Probabilistic Symmetric         | 62.220*                                                      | 21.634*                                                      | 15.128                                                       | 15.817*                                                      | 35.478*                                                      | 9.681*                                              |
| Clark                           | 63.073*                                                      | 21.439*<br>(does not differ from pos. benchmark; $p = .42$ ) | 14.830                                                       | 15.334*                                                      | 35.488*                                                      | 9.322                                               |
| Additive Symmetric              | 61.254*<br>(does not differ from pos. benchmark; $p = .08$ ) | 21.059                                                       | 15.683*                                                      | 15.447*                                                      | 34.090*                                                      | 9.517*                                              |
| <b>Shannon's entropy family</b> |                                                              |                                                              |                                                              |                                                              |                                                              |                                                     |
| Jeffreys                        | 61.973*                                                      | 21.490*                                                      | 15.313*                                                      | 15.622*                                                      | 35.108*                                                      | 9.599*                                              |
| Jensen difference               | 62.076*                                                      | 21.531*                                                      | 15.293*<br>(does not differ from pos. benchmark; $p = .55$ ) | 15.683*                                                      | 35.303*                                                      | 9.630*                                              |
| <b>Combined methods</b>         |                                                              |                                                              |                                                              |                                                              |                                                              |                                                     |
| Kumar-Johnson                   | 60.791<br>(differs from pos. benchmark; $p = .02$ )          | 21.213                                                       | <b>15.725</b><br>(=positive benchmark)                       | 15.036*<br>(does not differ from pos. benchmark; $p = .08$ ) | 33.371*<br>(does not differ from pos. benchmark; $p = .14$ ) | 9.332*<br>(differs from pos. benchmark; $p = .02$ ) |

|     |        |         |        |                                           |         |        |
|-----|--------|---------|--------|-------------------------------------------|---------|--------|
| Avg | 63.720 | 21.778# | 14.430 | <b>16.362</b><br>(=positive<br>benchmark) | 40.298* | 9.414* |
|-----|--------|---------|--------|-------------------------------------------|---------|--------|

## legend

**gender** = gender of the person;

**age** = age of the person;

**latency** = time with symptoms but no diagnosis;

**disease group** = category of the diagnosis referring to the affected organ or pathophysiology (e.g. neuromuscular disease, metabolic disease);

**diagnostic system** = greater category the diagnosis can be assigned to (e.g. RD, CD) not especially considering the affected organ; exact diagnosis = exact name of the one diagnosis.

\* Fields do not differ significantly from the positive benchmark in this category; see p value in those fields or if no p values are mentioned the matching- values lie in between the benchmark and the furthest value which is only just not differing significantly from this benchmark

# Fields do not differ significantly from the (pseudo-) random matching (=negative benchmark); see p value in those fields or if no p values are mentioned the matching- values lie in between the benchmark and the furthest value which is only just not differing significantly from this benchmark.
